# Supplementary material for: Knockdown of USP14 inhibits PDGF-BB-induced vascular smooth muscle cell dedifferentiationviainhibiting mTOR/P70S6K signaling pathway
Source: Royal Society of Chemistry journal article supplement (doi:10.1039/c9ra04726c), 2019-01-01
Supplement: c9ra04726c1.pdf [file c9ra04726c1.pdf]

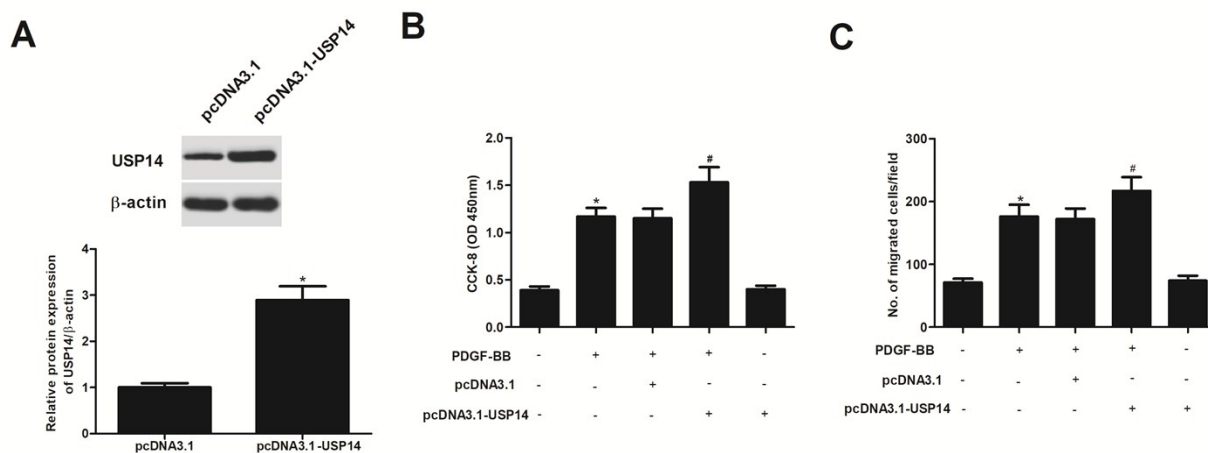

**Supplementary Figure 1. Overexpression of USP14 promotes the proliferation and migration in PDGF-BB-induced HASMCs.** (A) Western blot analysis was performed to detect the USP14 expression after transfection with pcDNA3.1 or pcDNA3.1-USP14. \* $p < 0.05$  vs. pcDNA3.1 group. HASMCs were transfected with pcDNA3.1 or pcDNA3.1-USP14 in the presence of PDGF-BB (40 ng/ml) for 24 h; or only transfected with pcDNA3.1-USP14 for 24 h. (B) CCK-8 was performed to evaluate cell proliferation of HASMCs. (C) Transwell assays were carried out to evaluate cell migration of HASMCs. \* $p < 0.05$  vs. control group; # $p < 0.05$  vs. pcDNA3.1+PDGF-BB group.

**A**

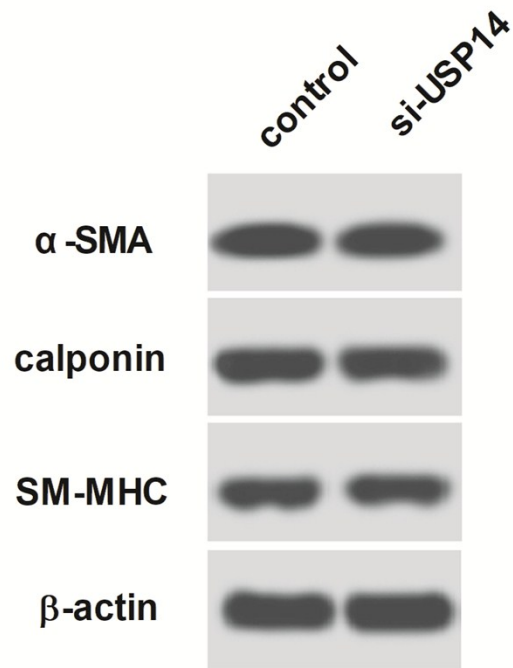

**B**

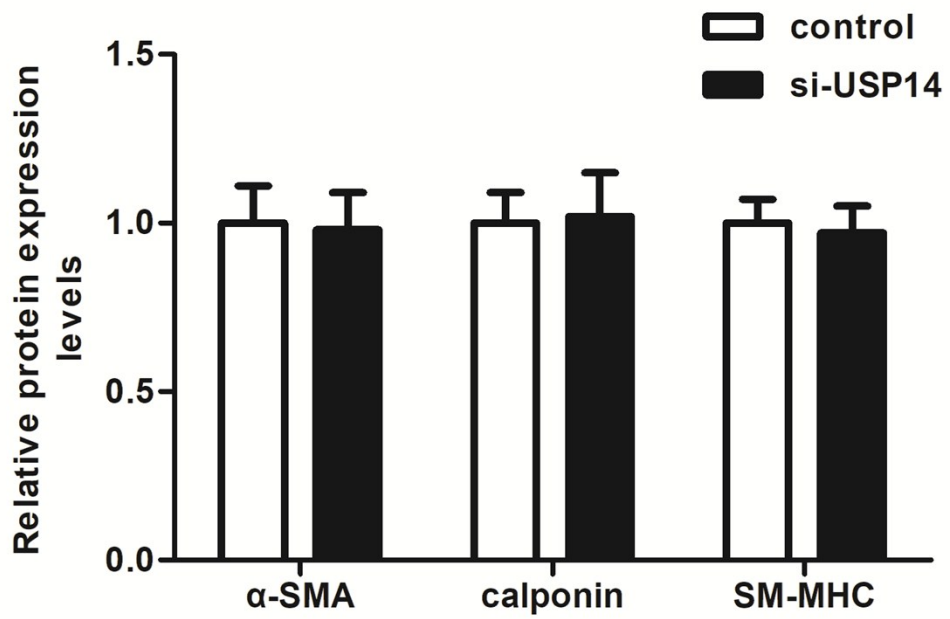

**Supplementary Figure 2. Effect of si-USP14 on the expression levels of VSMCs markers in HASMCs.** HASMCs were transfected with si-USP14 for 24 h. (A) The expression levels of VSMCs markers including  $\alpha$ -SMA, calponin and SM-MHC were measured using western blot analysis. (B) Quantification analysis of  $\alpha$ -SMA, calponin and SM-MHC.

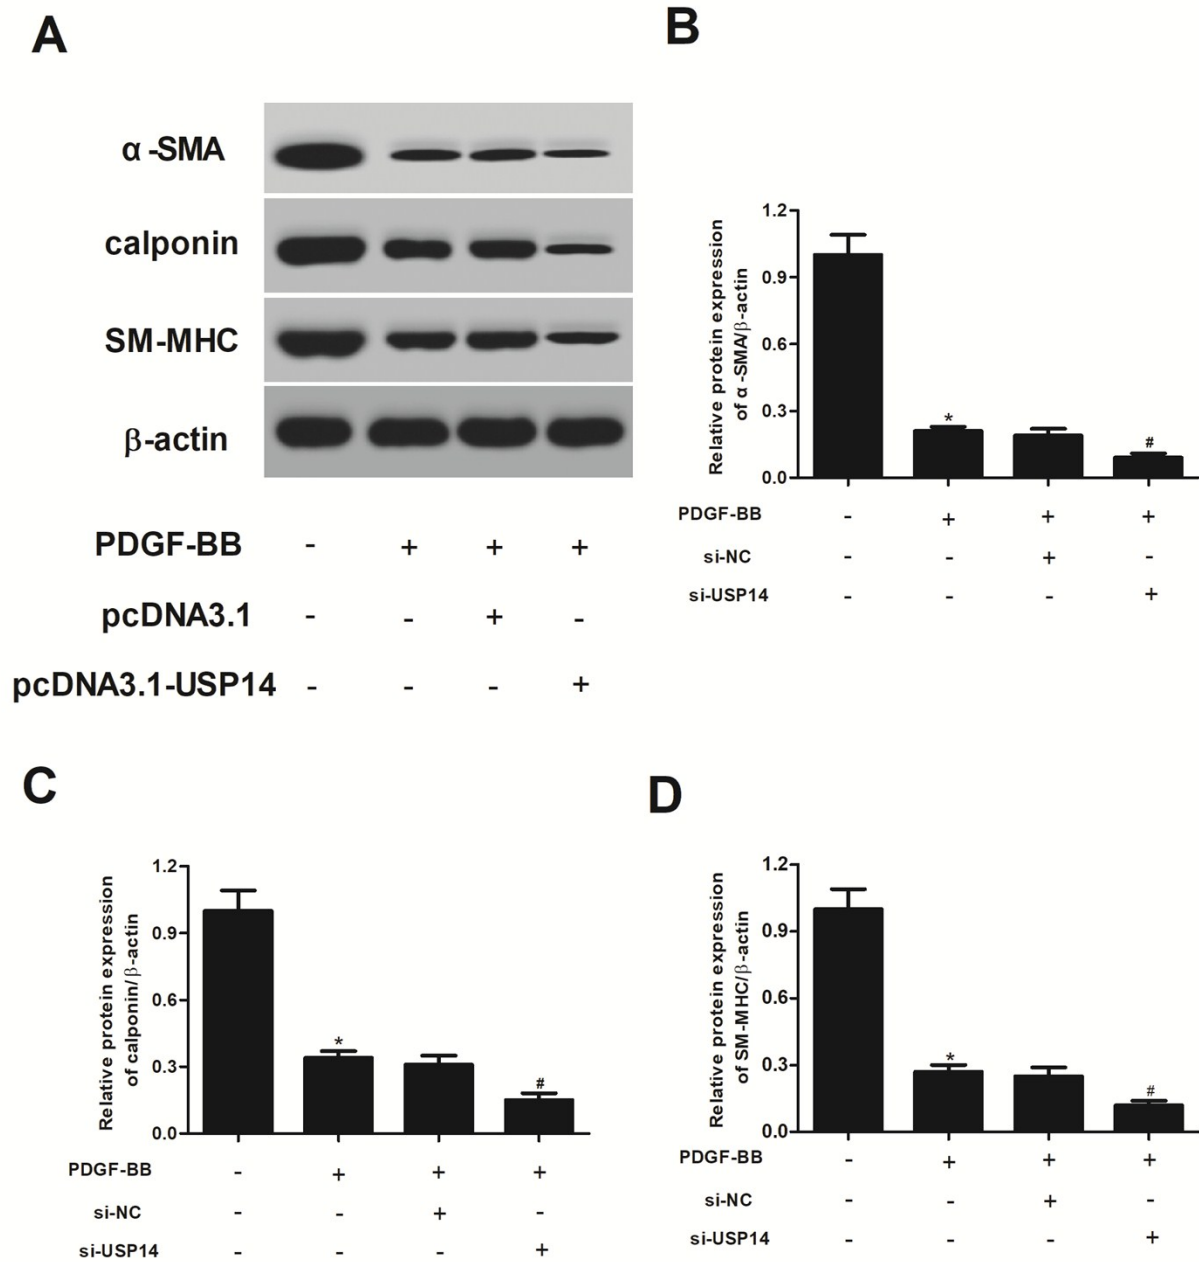

**Supplementary Figure 3. Overexpression of USP14 inhibits the expression levels of VSMCs markers in PDGF-BB-stimulated HASMCs.** HASMCs were transfected with pcDNA3.1 or pcDNA3.1-USP14 in the presence of PDGF-BB (40 ng/ml) for 24 h. (A) The expression levels of VSMCs markers including  $\alpha$ -SMA, calponin and SM-MHC were measured using western blot analysis. (B-D) Quantification analysis of  $\alpha$ -SMA, calponin and SM-MHC. \* $p < 0.05$  vs. control group; # $p < 0.05$  vs. pcDNA3.1+PDGF-BB group.

**A**

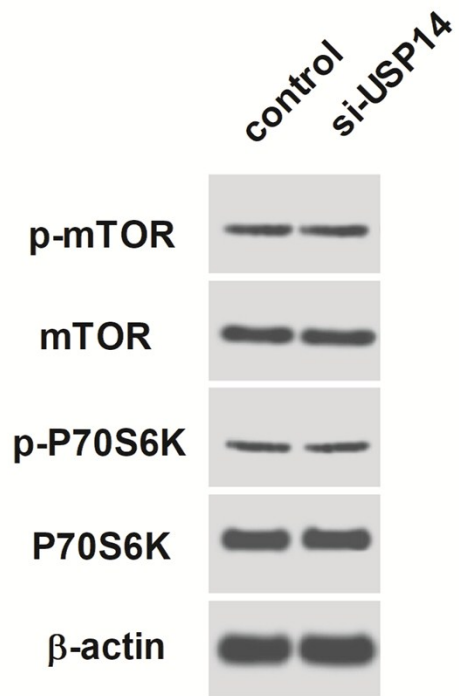

**B**

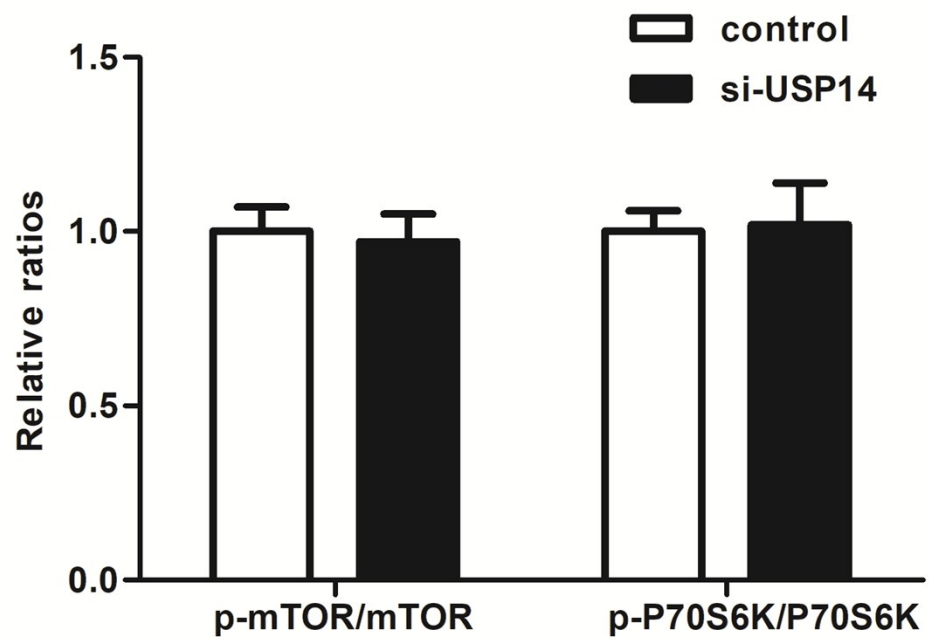

**Supplementary Figure 4. Effect of si-USP14 on mTOR/P70S6K signaling pathway in HASMCs.** HASMCs were transfected with si-USP14 for 24 h. (A) The expression levels of mTOR, P70S6K, p-mTOR and p-P70S6K were detected using western blot analysis. (B) Quantification analysis of p-mTOR/mTOR and p-P70S6K/P70S6K.

**A**

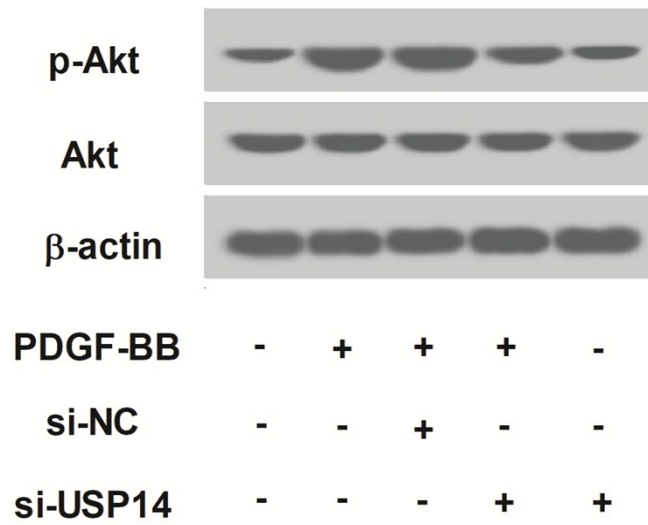

**B**

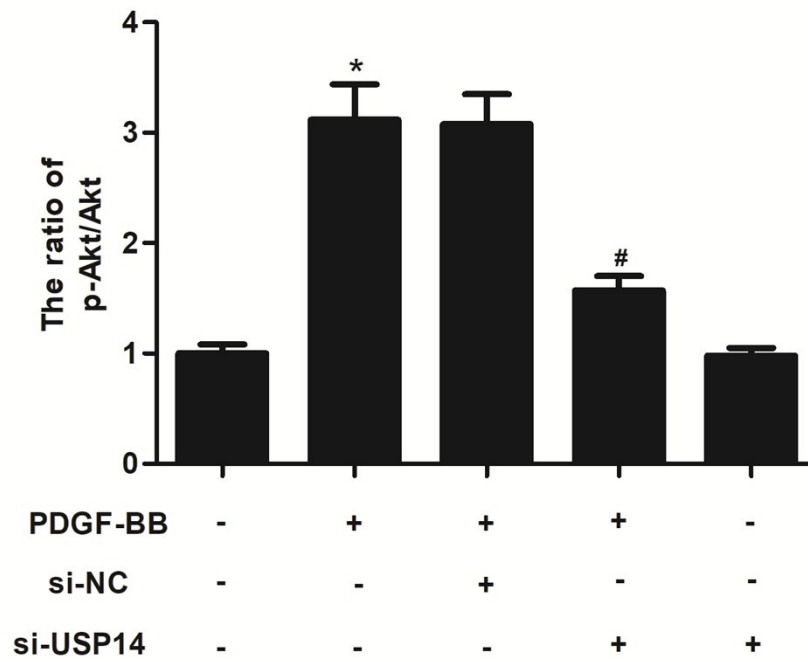

**Supplementary Figure 5. Knockdown of USP14 prevents the PDGF-BB-induced the phosphorylation of Akt in HASMCs.** (A) The phosphorylation of Akt and total Akt were detected using western blot analysis. (B) Quantification analysis of p-Akt/Akt. \* $p < 0.05$  vs. control group; # $p < 0.05$  vs. si-NC+PDGF-BB group.



**A**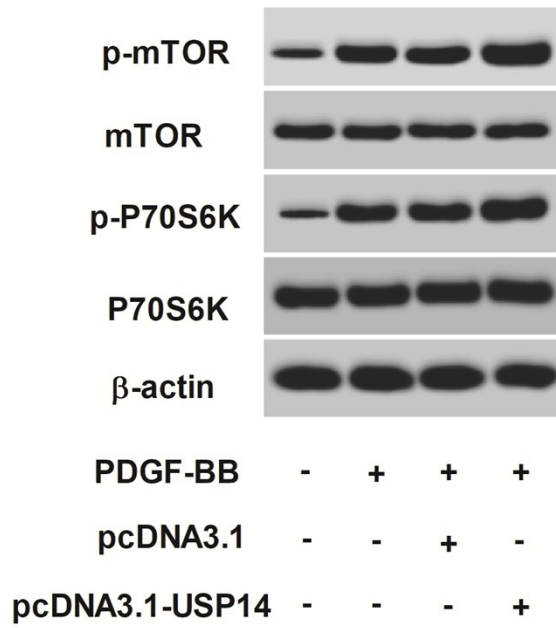**B**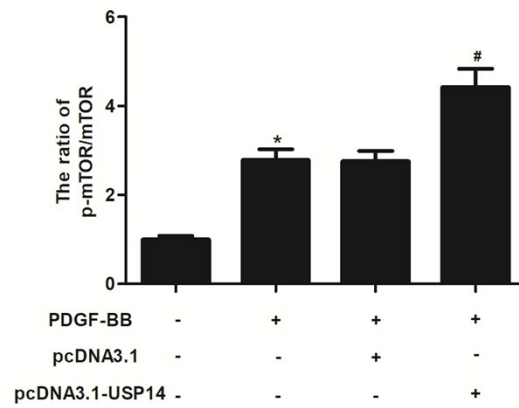**C**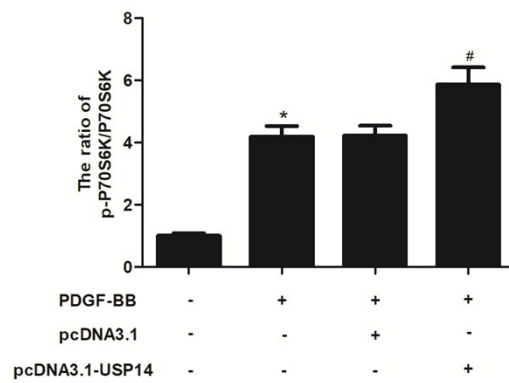

**Supplementary Figure 6. Overexpression of USP14 promotes the PDGF-BB-induced activation of mTOR/P70S6K signaling in HASMCs.** (A) The effect of USP14 overexpression on mTOR/P70S6K signaling pathway was examined by detecting the expression levels of mTOR, P70S6K, p-mTOR and p-P70S6K using western blot analysis. (B and C) Quantification analysis of p-mTOR/mTOR and p-P70S6K/P70S6K. \* $p < 0.05$  vs. control group; # $p < 0.05$  vs. pcDNA3.1+PDGF-BB group.

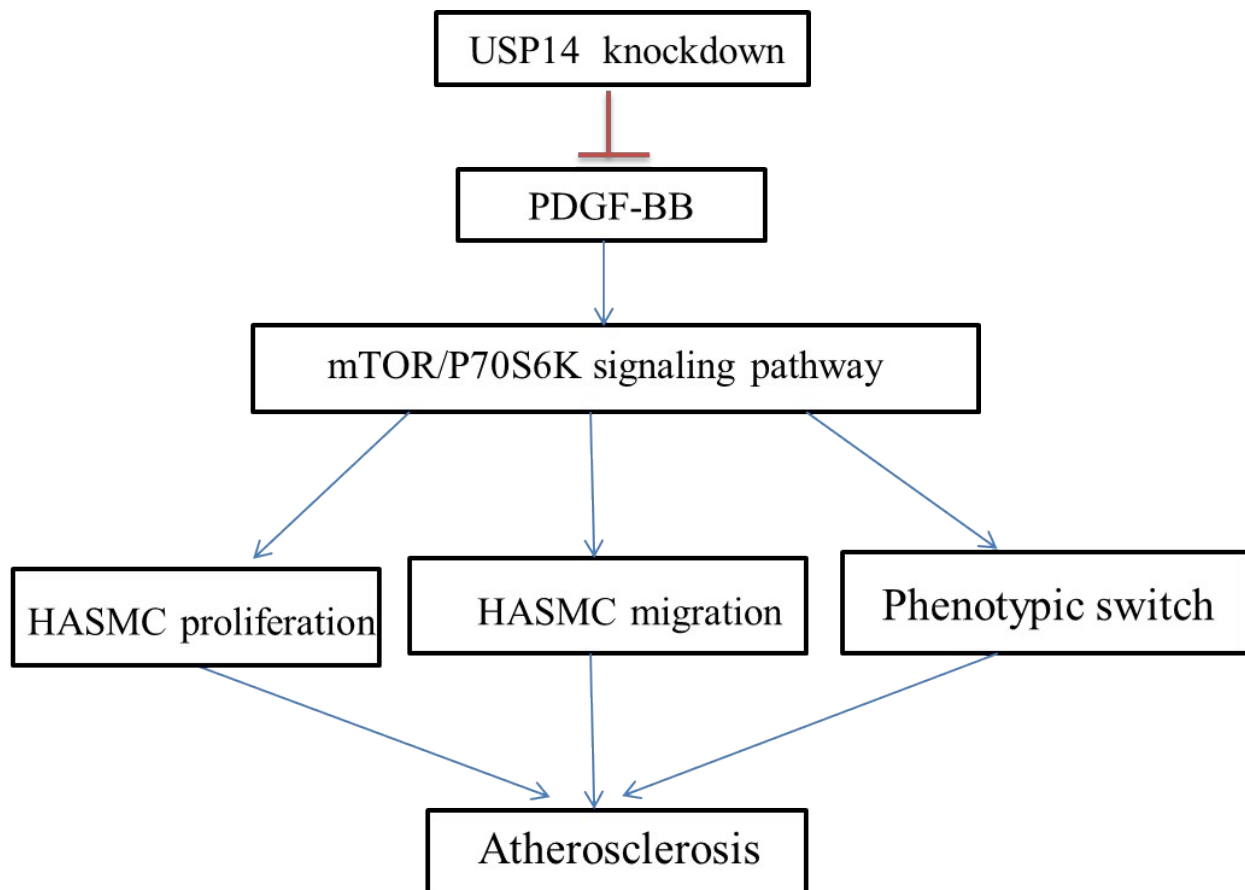

**Supplementary Figure 7. A proposed model showing USP14 regulates PDGF-BB-induced vascular smooth muscle cell dedifferentiation via the mTOR/P70S6K signaling pathway.**
